# Supplementary material for: Highly Ordered Spatial Organization of the Structural Long Noncoding NEAT1 RNAs within Paraspeckle Nuclear Bodies
Source: PubMed Central journal article supplement — Mol Biol Cell. 2010 Nov 15;21(22):4020–7. doi: 10.1091/mbc.E10-08-0690 (PMC2982136; doi:10.1091/mbc.e10-08-0690), 2010-11-15
Supplement: E10-08-0690_1.pdf [file E10-08-0690_1.pdf]

Supplemental Fig S1.

**EM-ISH U1 snRNA**

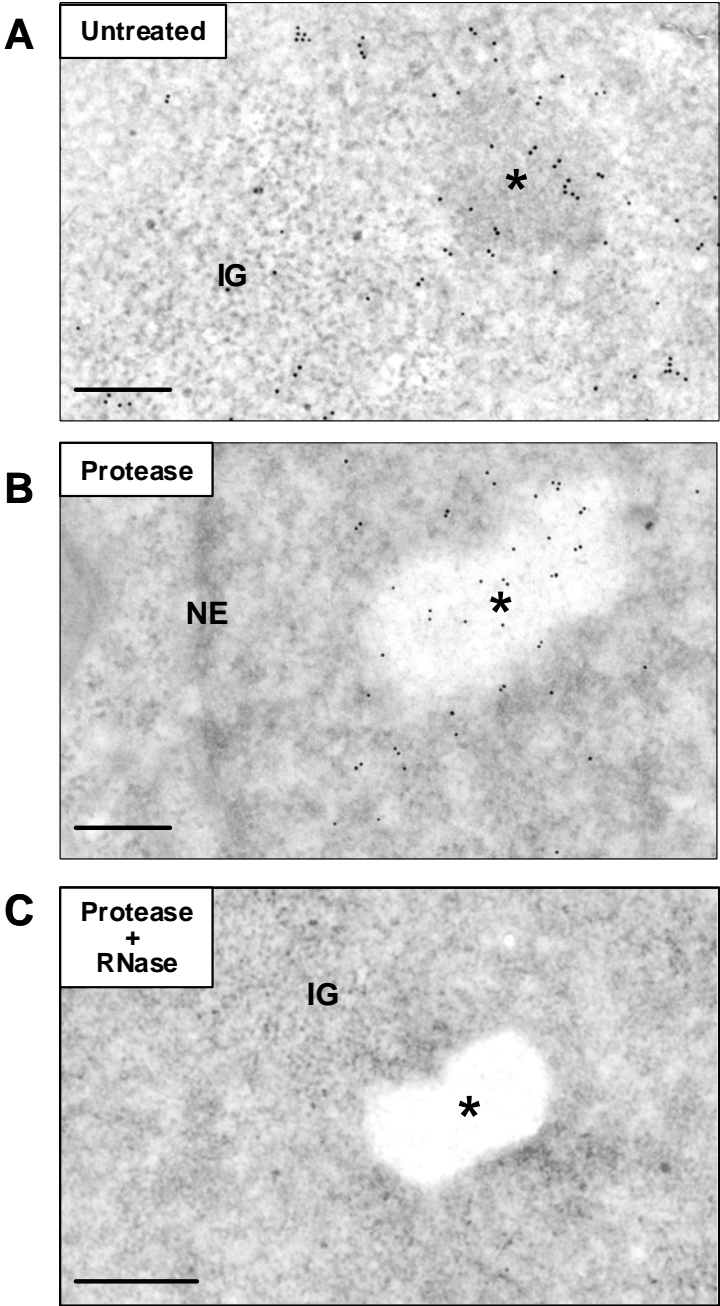

Supplemental Fig S2.

**NEAT1\_v2 localization by EM-ISH**

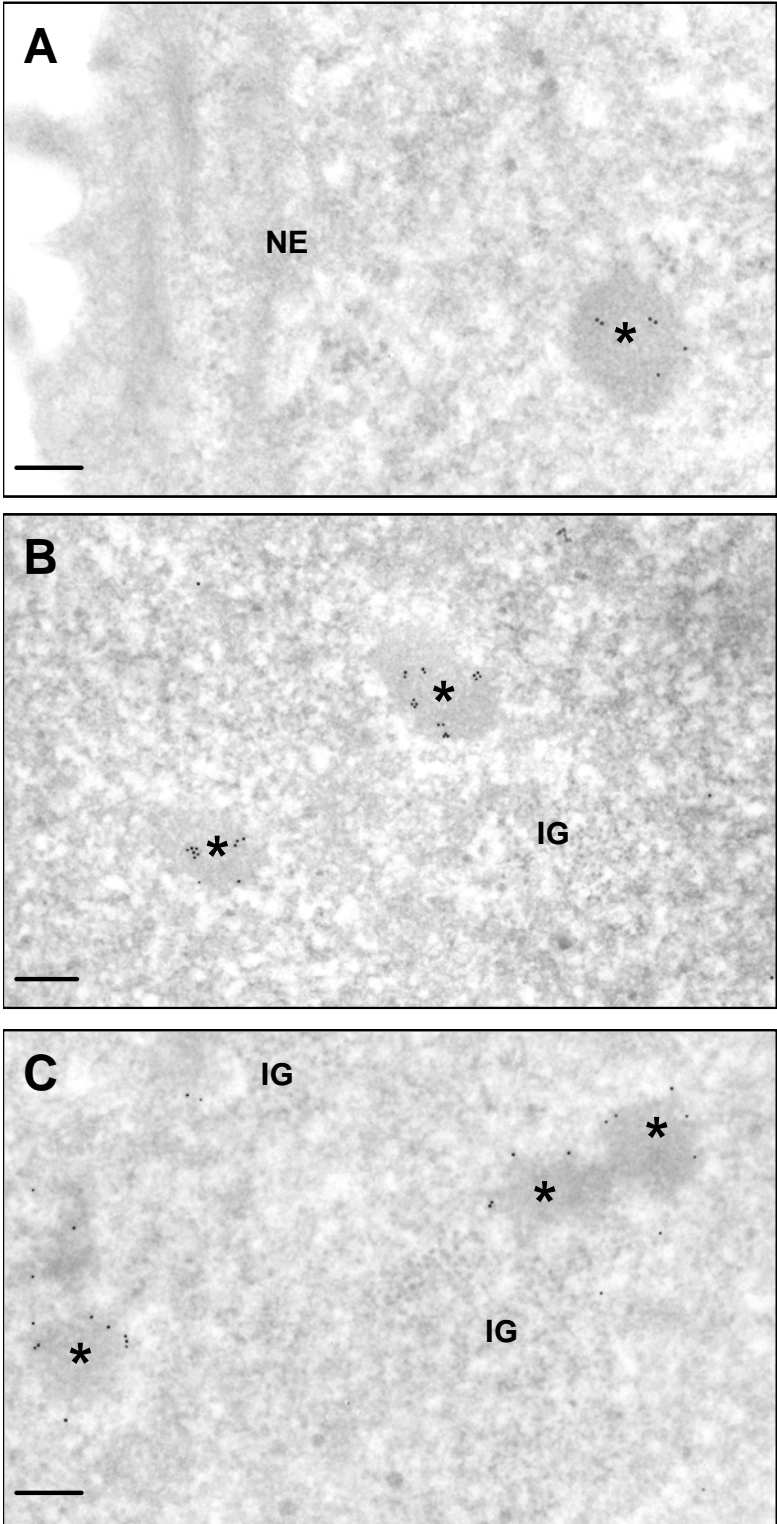

Supplemental Fig S3.

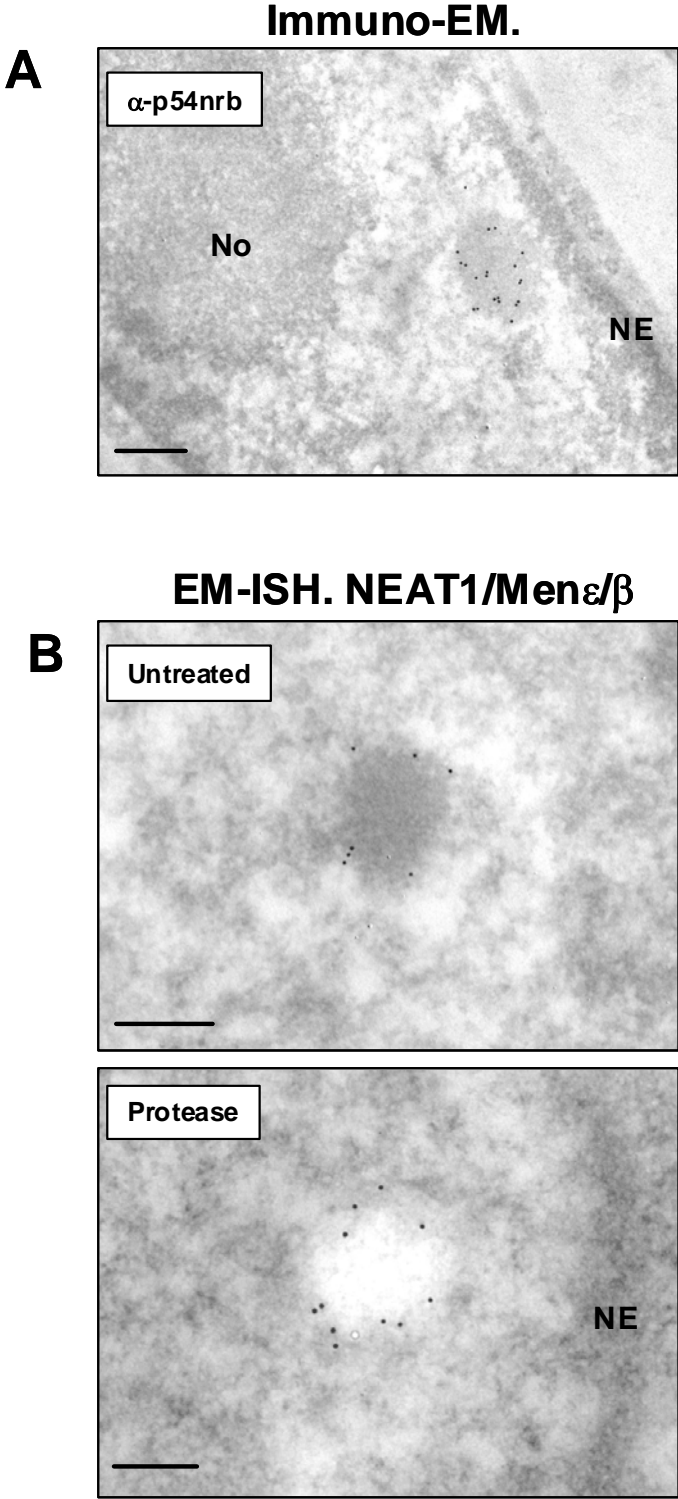

Supplemental Fig S4.

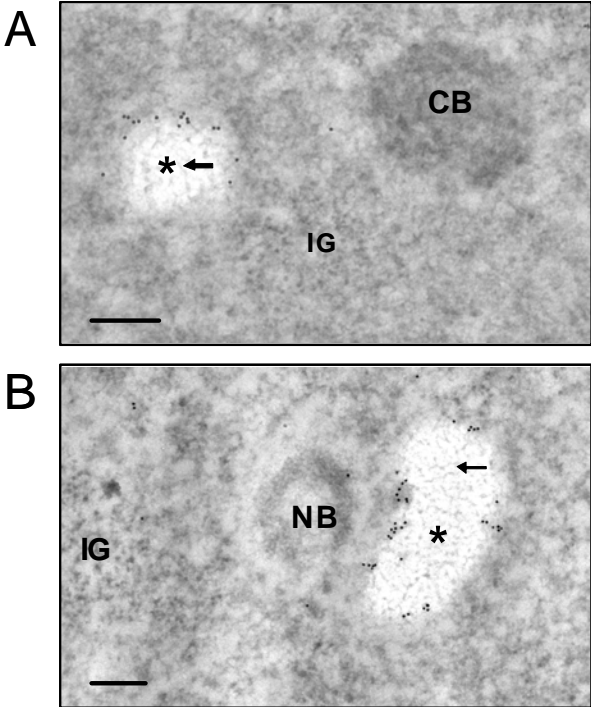

### Legends Supplemental Figures.

#### **Fig. S1. Detection of the U1 snRNA within IGAZ/PSP by EM-ISH.**

(A) Hybridization was carried out on untreated thin-sections of HeLa cells and confirms presence of the U1 snRNA in the nucleoplasm, the interchromatin granules (IG) and the IGAZ/PSP (star).

(B) Hybridization was performed following protease treatment of the thin sections. Notice low labelling of the cytoplasm and high labelling, including in its central part, of the bleached IGAZ/PSP (star). NE: Nuclear envelope.

(C) Protease and RNase treatments performed prior to hybridization result in no detection of U1 snRNA molecules over the IGAZ/PSP (star) and the interchromatin granules (IG), confirming specificity of RNA detection.

Bars: 200 nm.

#### **Fig. S2. Specificity of the *NEAT1\_v2* DNA probes.**

*NEAT1\_v2* transcripts were detected by *in situ* hybridization with 3 different probes on untreated thin-sections of HeLa cells. Position of the D1, D2 and 3' end probes along the *NEAT1\_v2* DNA sequence is shown in Fig.3A. Notice highly specific labelling of the IGAZ/PSP (stars) and low labelling of surrounding nucleoplasmic regions with the D1 in (A), the D2 in (B) and the 3' end probe in (C).

Bars: 200 nm.

#### **Fig. S3. Ultrastructure of IGAZ/PSP in mouse cells.**

(A) Mouse IGAZ/PSP were analysed in Lowicryl-embedded NIH 3T3 cells by immunolabelling with a primary antibody directed against the human P54NRB/NONO peptide and a secondary antimouse antibody coupled to 10 nm gold particles. A highly specific labelling of a IGAZ/PSP is illustrated. No: Nucleolus; NE: Nuclear envelope.

(B) EM-ISH with a mouse-specific probe (nt 224-3082) targeting the 5'-ends of the mouse *NEAT1\_v1* and *NEAT1\_v2* (or Menε/β) transcripts on untreated (top) or protease-treated thin-sections (bottom). Notice peripheral labelling of the IGAZ/PSP in both cases. Following protease treatment, gold particles are concentrated into a narrow grey zone surrounding the bleached centre of the IGAZ/PSP.

Bars: 200 nm.

#### **Fig. S4. Hyper-sensitivity of IGAZ/PSP towards protease treatment on thin sections of HeLa cells.**

(A) and (B). Protease sensitivity of the IGAZ/PSP (star) is illustrated by bleaching as compared to the interchromatin granules (IG), the Coiled (Cajal) body (CB) in (A) and the nuclear body (NB) in

**(B)** which are well-contrasted after uranyl-acetate staining. As a result of protein digestion, a network of dense fibrils (arrows) is revealed within the IGAZ/PSP. These fibrils are not labelled by EM-ISH with the human NEAT1 5'-end probe in **(A)** and **(B)**. Bars: 200 nm.
